# Supplementary material for: Analysis of Severe Illness After Postvaccination COVID-19 Breakthrough Among Adults With and Without HIV in the US
Source: PubMed Central journal article supplement (PMC9561947; doi:10.1001/jamanetworkopen.2022.36397), 2022-10-13

## Supplemental Online Content

Lang R, Humes E, Coburn SB, et al; Corona-Infectious-Virus Epidemiology Team (CIVETs) of the NA-ACCORD of IeDEA. Analysis of severe illness after postvaccination COVID-19 breakthrough among adults with and without HIV in the US. *JAMA Netw Open*. 2022;5(10):e2236397. doi:10.1001/jamanetworkopen.2022.36397

**eTable 1.** Definitions of In-Care and Criteria Used to Identify People With (PWH) and Without HIV (PWoH)

**eTable 2.** Diagnosis and Procedure Codes Used to Ascertain Comorbidities and Outcomes

**eTable 3.** Proportion of PWH Who Received Additional Vaccine Doses by CD4 Count at Fully Vaccinated (N=1,241)

**eFigure 1.** Time From Primary Series Completion to an Additional Vaccine Dose, by HIV Status

**eTable 4.** Characteristics of SARS-CoV-2 Breakthrough Infection, Both Severe and Nonsevere by HIV Status (N=3,649)

**eFigure 2.** Identification of Severe COVID-19 Breakthrough Infections

**eTable 5.** Severe COVID-19 Breakthrough Illness Incidence Rates and 95% Confidence Intervals, by Month and HIV Status

**eFigure 3.** Histograms of the Date of Severe SARS-CoV-2 Breakthrough Infection, by HIV Status

**eFigure 4.** Cumulative Incidence of Severe COVID-19 Breakthrough Illness (and 95% Confidence Intervals Represented by the Shading) Stratified by CD4 Count and HIV Status

**eTable 6.** Characteristics of Participants With Breakthrough COVID-19 Illness Requiring Hospitalization, Mechanical Ventilation or in Those Who Died

**eFigure 5.** Outcomes of Breakthrough Illness Among Those Hospitalized After Fully Vaccinated to Dec 31, 2021, by HIV Status (n=170 PWoH) and CD4 Count (n=23 <350 Cells/mm<sup>3</sup> and n=45 ≥350 Cells/mm<sup>3</sup>) Among PWH

This supplemental material has been provided by the authors to give readers additional information about their work.

**eTable 1:** Definitions of In-Care and Criteria Used to Identify People With (PWH) and Without HIV (PWoH)

| Cohort                                                     | Description                                                                                                               | “In care” or “in cohort”                                           | PWH                                                                       |
|------------------------------------------------------------|---------------------------------------------------------------------------------------------------------------------------|--------------------------------------------------------------------|---------------------------------------------------------------------------|
| <sup>a</sup> Kaiser Permanente Mid-Atlantic States (KPMAS) | Integrated Health system                                                                                                  | In Care – KPMAS membership for ≥1 month in 2020                    | HIV registry*                                                             |
| Kaiser Permanente Northern California (KPNC)               | Integrated Health system                                                                                                  | In Care – KPNC membership for ≥1 month between 3/1/20 and 12/31/20 | HIV registry*                                                             |
| University of North Carolina Chapel Hill (UNC)             | Medical center cohort                                                                                                     | ≥1 encounter with UNC Health in 2019 and alive as of 03/01/2020    | HIV diagnosis (by ICD diagnosis code)                                     |
| Veterans Aging Cohort Study (VACS)                         | National cohort of all PWH and 1:2 demographically-matched PWoH in care in the Veterans Health Administration (VA) system | Enrolled in VACS from 1996-2017 and alive in 2020                  | HIV diagnosis (presence of 1 inpatient or 2 outpatient ICD codes for HIV) |

<sup>a</sup> The Kaiser Permanente Mid-Atlantic States and Northern California HIV Registries are databases of members diagnosed with HIV since 1998 and 1980, respectively. Primary sources used to identify HIV patients are HIV-specific laboratory tests, antiretroviral therapy, hospital-based HIV diagnosis, and diagnosis.

**eTable 2:** Diagnosis and Procedure Codes Used to Ascertain Comorbidities and Outcomes

| <b>Condition</b>                                                         | <b>ICD-10 Diagnosis Codes</b>                                                                                                                                                                                                                                                                                                                                                                                                                                                                                                                                                                                                                                                                                                   |
|--------------------------------------------------------------------------|---------------------------------------------------------------------------------------------------------------------------------------------------------------------------------------------------------------------------------------------------------------------------------------------------------------------------------------------------------------------------------------------------------------------------------------------------------------------------------------------------------------------------------------------------------------------------------------------------------------------------------------------------------------------------------------------------------------------------------|
| <b>COVID-19 breakthrough infection Between Jan 1, 2020 -Dec 31, 2021</b> | U07.1 (specific to COVID), B34.2 (Coronavirus infection, unspecified), B97.21 (SARS-associated coronavirus causing disease classified elsewhere), B97.29 (other coronavirus as the cause of diseases classified elsewhere, J12.81 (pneumonia due to SARS-associated coronavirus, or O98.5 COVID in pregnancy, child-birth or postpartum                                                                                                                                                                                                                                                                                                                                                                                         |
| <b>Immune suppressive Conditions</b>                                     |                                                                                                                                                                                                                                                                                                                                                                                                                                                                                                                                                                                                                                                                                                                                 |
| Organ or tissue transplantation                                          | Z94.x                                                                                                                                                                                                                                                                                                                                                                                                                                                                                                                                                                                                                                                                                                                           |
| Rheumatoid Arthritis                                                     | M05, M06                                                                                                                                                                                                                                                                                                                                                                                                                                                                                                                                                                                                                                                                                                                        |
| Lupus                                                                    | M32                                                                                                                                                                                                                                                                                                                                                                                                                                                                                                                                                                                                                                                                                                                             |
| Cancer                                                                   | C00-C14, C15-C26, C30-C39, C40-C41, C43-C44, C45-C49, C50, C51-C58, C60-C63, C64-C68, C69-C72, C73-C75, C76-C80, C81-C96, C7A, C7B, D45                                                                                                                                                                                                                                                                                                                                                                                                                                                                                                                                                                                         |
| Pregnancy                                                                | Z3A, O00-O16, O20-O48, O60-O77, O80-O82, O94-O9A                                                                                                                                                                                                                                                                                                                                                                                                                                                                                                                                                                                                                                                                                |
| <b>Comorbidities</b>                                                     |                                                                                                                                                                                                                                                                                                                                                                                                                                                                                                                                                                                                                                                                                                                                 |
| Diabetes                                                                 | E11.x                                                                                                                                                                                                                                                                                                                                                                                                                                                                                                                                                                                                                                                                                                                           |
| End stage renal disease                                                  | N18.5 CKD stage 5, N18.6 ESRD                                                                                                                                                                                                                                                                                                                                                                                                                                                                                                                                                                                                                                                                                                   |
| Hypertension                                                             | I10-I15.9, I67.4)                                                                                                                                                                                                                                                                                                                                                                                                                                                                                                                                                                                                                                                                                                               |
| Obesity                                                                  | E66.x, O99.21x                                                                                                                                                                                                                                                                                                                                                                                                                                                                                                                                                                                                                                                                                                                  |
| <b>Outcomes of COVID-19 Hospitalization</b>                              |                                                                                                                                                                                                                                                                                                                                                                                                                                                                                                                                                                                                                                                                                                                                 |
| Mechanical Ventilation                                                   | <p><b>ICD-10 procedure codes:</b><br/>           0BH17EZ: Intubation<br/>           5A1945Z: Respiratory Ventilation, 24-96 Consecutive Hours<br/>           5A1955Z: Respiratory Ventilation, Greater than 96 Consecutive Hours<br/>           5A1935Z: Respiratory Ventilation, Less than 24 Consecutive Hours<br/>           5A1522G: Extracorporeal Oxygenation, Perph VA ECMO<br/>           5A15A2G: Extracorporeal Oxygenation, Perph VA ECMO, Intraop<br/>           5A15A2H: Extracorporeal Oxygenation, Perph VV ECMO, Intraop</p> <p><b>CPT codes:</b><br/>           94002: HC Ventilation Assist &amp; Mgmt Inpatient 1st day<br/>           94003: HC Ventilation Assist &amp; Mgmt Inpatient subsequent days</p> |

**eTable 3:** Proportion of PWH Who Received Additional Vaccine Doses by CD4 Count at Fully Vaccinated (N=1,241).

| <b>CD4 at fully vaccinated (cells/mm<sup>3</sup>)</b> | <b># of COVID-19 breakthroughs in PWH</b> | <b># who received an additional COVID-19 vaccine, n (%)</b> |
|-------------------------------------------------------|-------------------------------------------|-------------------------------------------------------------|
| <200                                                  | 54                                        | 9 (17)                                                      |
| 200-349                                               | 109                                       | 17 (16)                                                     |
| 350-499                                               | 182                                       | 41 (23)                                                     |
| ≥500                                                  | 707                                       | 141 (20)                                                    |
| Unknown                                               | 189                                       | 34 (18)                                                     |

**eFigure 1:** Time From Primary Series Completion to an Additional Vaccine Dose, by HIV Status

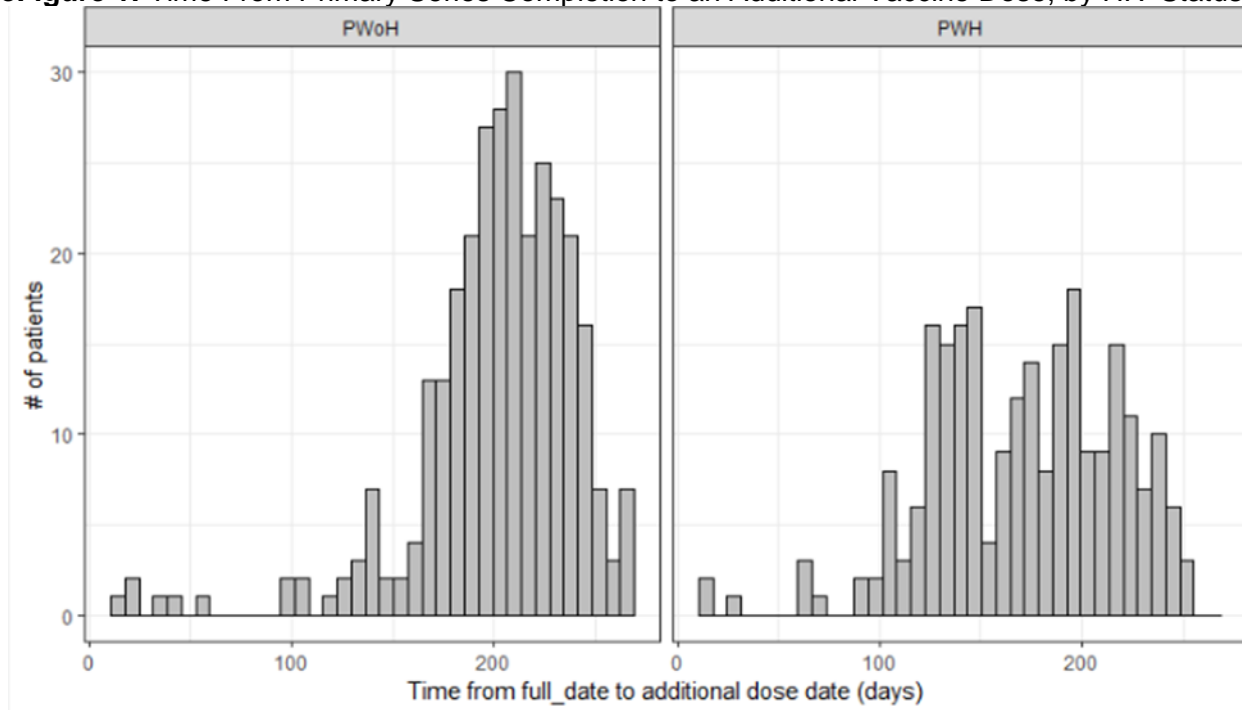

Footnotes:  
PWH=People with HIV  
PWoH=People without HIV

**eTable 4:** Characteristics of SARS-CoV-2 Breakthrough Infection, Both Severe and Nonsevere by HIV Status (N=3,649)

| Characteristic                               | Patients, No. (%)                   |                                |                                     |                               |
|----------------------------------------------|-------------------------------------|--------------------------------|-------------------------------------|-------------------------------|
|                                              | PWOH N=2,408                        |                                | PWH N=1,241                         |                               |
|                                              | No Severe Breakthrough<br>N = 2,238 | Severe Breakthrough<br>N = 170 | No Severe Breakthrough<br>N = 1,162 | Severe Breakthrough<br>N = 79 |
| <sup>a</sup> <b>Age (years)</b>              |                                     |                                |                                     |                               |
| <55                                          | 907 (40.5)                          | 10 (5.8)                       | 534 (46.0)                          | 16 (20.3)                     |
| 55-64                                        | 436 (19.5)                          | 56 (32.9)                      | 333 (28.6)                          | 26 (32.9)                     |
| 65-74                                        | 726 (32.4)                          | 71 (41.8)                      | 240 (20.7)                          | 24 (30.4)                     |
| 75+                                          | 506 (22.6)                          | 33 (19.4)                      | 55 (4.7)                            | 13 (16.5)                     |
| <b>Sex</b>                                   |                                     |                                |                                     |                               |
| Male                                         | 1944 (86.9)                         | 164 (96.5)                     | 1,065 (91.7)                        | 71 (89.9)                     |
| Female                                       | 294 (13.1)                          | 6 (3.5)                        | 97 (8.3)                            | 8 (10.1)                      |
| <b>Ethnicity and Race</b>                    |                                     |                                |                                     |                               |
| Hispanic                                     | 342 (15.3)                          | 24 (14.1)                      | 173 (14.9)                          | 10 (12.7)                     |
| Non-Hispanic Black/ African American         | 1,060 (47.4)                        | 91 (53.5)                      | 515 (44.3)                          | 40 (50.6)                     |
| Non-Hispanic White                           | 694 (31.0)                          | 50 (29.4)                      | 397 (34.2)                          | 24 (30.4)                     |
| Other                                        | 127 (5.7)                           | 4 (2.3)                        | 66 (5.7)                            | 5 (6.3)                       |
| Unknown                                      | 15 (0.7)                            | 1 (0.6)                        | 11 (0.9)                            | 0 (0.0)                       |
| <b>Month of breakthrough</b>                 |                                     |                                |                                     |                               |
| Jan-June                                     | 231 (10.3)                          | 16 (9.4)                       | 129 (11.1)                          | 5 (6.3)                       |
| July-Oct                                     | 1,024 (45.8)                        | 108 (63.5)                     | 585 (50.3)                          | 54 (68.4)                     |
| Nov-Dec                                      | 983 (43.9)                          | 46 (27.0)                      | 448 (38.6)                          | 20 (25.3)                     |
| <b>Vaccine series</b>                        |                                     |                                |                                     |                               |
| Pfizer                                       | 1,103 (49.3)                        | 91 (53.5)                      | 559 (48.1)                          | 46 (58.2)                     |
| Pfizer + 3rd dose                            | 187 (8.4)                           | 7 (4.1)                        | 160 (13.8)                          | 5 (6.3)                       |
| Moderna                                      | 629 (28.1)                          | 47 (27.6)                      | 285 (24.5)                          | 16 (20.3)                     |
| Moderna + 3rd dose                           | 90 (4.0)                            | 5 (2.9)                        | 67 (5.8)                            | 1 (1.3)                       |
| J&J                                          | 215 (9.6)                           | 20 (11.8)                      | 82 (7.1)                            | 11 (13.9)                     |
| J&J + 2 <sup>nd</sup> dose                   | 14 (0.6)                            | 1 (0.6)                        | 9 (0.8)                             | 0 (0.0)                       |
| <b>COVID prior to full vaccination date</b>  | 283 (12.6)                          | 9 (5.2)                        | 170 (14.6)                          | 6 (7.6)                       |
| <b>Comorbidities before fully vaccinated</b> |                                     |                                |                                     |                               |

|                                     |              |            |            |           |
|-------------------------------------|--------------|------------|------------|-----------|
| Obese BMI (>=30 kg/m <sup>2</sup> ) | 1,132 (50.6) | 86 (50.6)  | 402 (34.3) | 32 (40.5) |
| Diabetes                            | 718 (32.1)   | 99 (58.2)  | 276 (23.8) | 32 (40.5) |
| Hypertension                        | 1,287 (57.5) | 156 (91.8) | 577 (49.7) | 56 (70.9) |
| End-stage kidney disease            | 41 (1.8)     | 22 (12.9)  | 34 (2.9)   | 4 (5.1)   |
| Organ or tissue transplantation     | 27 (1.2)     | 16 (9.4)   | 17 (1.5)   | 1 (1.3)   |
| Rheumatoid arthritis                | 38 (2.8)     | 6 (3.5)    | 13 (1.1)   | 1 (1.3)   |
| Systemic lupus erythematosus        | 8 (0.4)      | 2 (1.2)    | 3 (0.3)    | 0 (0.0)   |
| Cancer diagnosis                    | 157 (7.0)    | 30 (17.6)  | 111 (9.5)  | 18 (22.8) |
| Pregnancy                           | 4 (0.2)      | 0 (0.0)    | 3 (0.3)    | 0 (0.0)   |

<sup>a</sup> Age was categorized into a 4-level group to assess a dose response relationship among older people (i.e., 55+) that are known to be at greater risk.

**eFigure 2:** Identification of Severe COVID-19 Breakthrough Infections

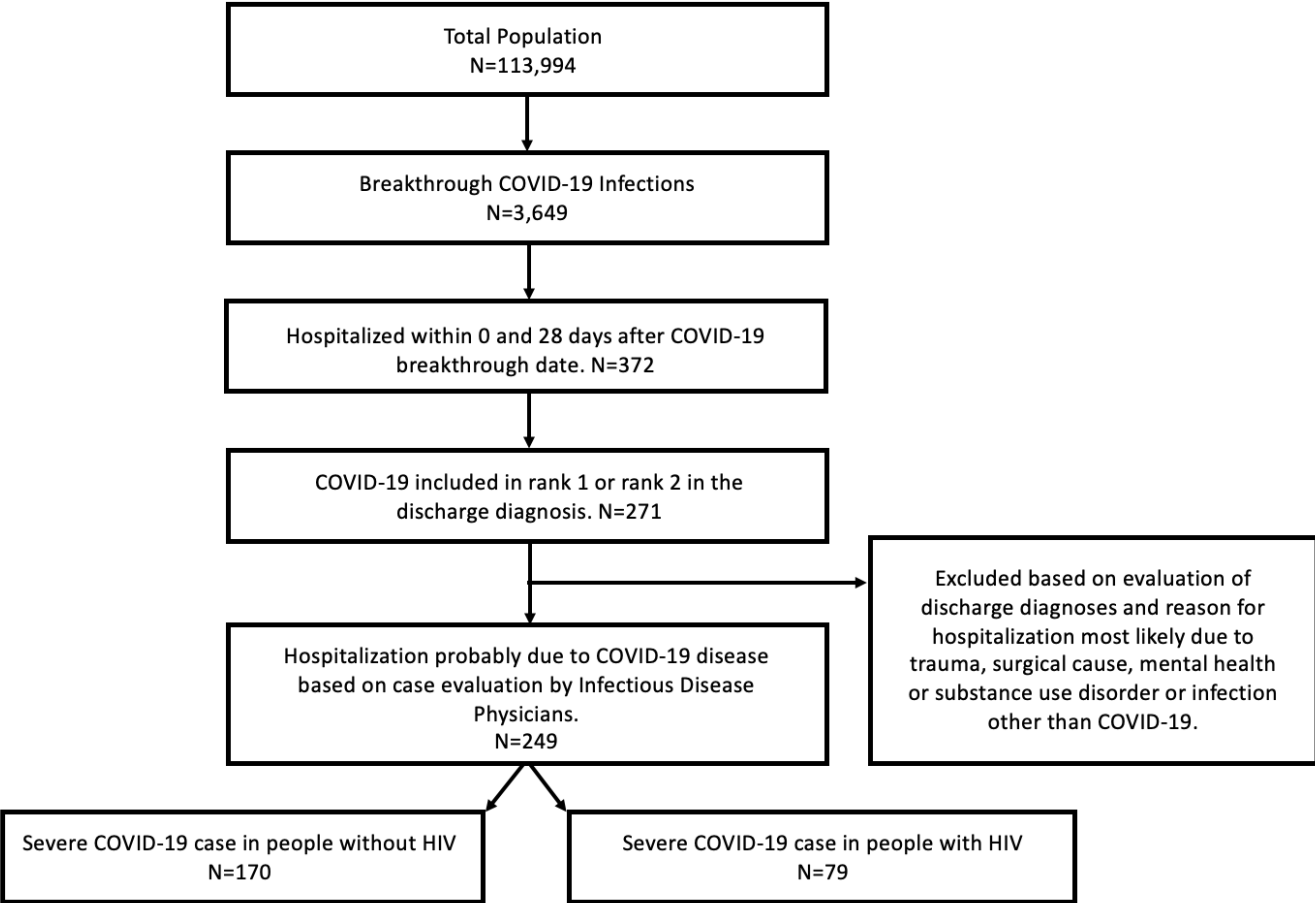



**eTable 5:** Severe COVID-19 Breakthrough Illness Incidence Rates and 95% Confidence Intervals, by Month and HIV Status

|                |         | # of severe COVID-19 breakthroughs | # of person-years | IR (95% CI) per 100 person years |
|----------------|---------|------------------------------------|-------------------|----------------------------------|
| <b>Total</b>   |         |                                    |                   |                                  |
|                | Overall | 249                                | 191.3             | 137.5 (117.6-159.8)              |
|                | PWH     | 79                                 | 67.7              | 116.7 (92.4-145.4)               |
|                | PWoH    | 170                                | 123.6             | 130.2 (114.5-147.4)              |
| <b>Moderna</b> |         |                                    |                   |                                  |
|                | Overall | 69                                 | 61.9              | 111.5 (86.8-141.2)               |
|                | PWH     | 17                                 | 21.0              | 81.1 (47.3-129.9)                |
|                | PWoH    | 52                                 | 40.9              | 127.1 (94.9-166.7)               |
| <b>Pfizer</b>  |         |                                    |                   |                                  |
|                | Overall | 149                                | 110.3             | 135.1 (114.3-158.7)              |
|                | PWH     | 51                                 | 41.1              | 124.1 (92.4-163.2)               |
|                | PWoH    | 98                                 | 69.2              | 141.7 (115.0-172.7)              |
| <b>J&amp;J</b> |         |                                    |                   |                                  |
|                | Overall | 31                                 | 19.2              | 161.5 (109.7-229.2)              |
|                | PWH     | 11                                 | 5.7               | 194.4 (97.0-347.8)               |
|                | PWoH    | 20                                 | 13.5              | 147.8 (90.2-228.2)               |

| <b>By calendar month</b> |         |    |       |                     |
|--------------------------|---------|----|-------|---------------------|
| Jan                      | Overall | 0  | 0.02  | 0.0 (0.0-19248.5)   |
|                          | PWH     | 0  | 0     | NA                  |
|                          | PWoH    | 0  | 0.02  | 0.0 (0.0-19248.1)   |
| Feb                      | Overall | 0  | 0.35  | 0.00 (0.00-1052.6)  |
|                          | PWH     | 0  | 0.14  | 0.0 (0.0-2641.9)    |
|                          | PWoH    | 0  | 0.21  | 0.0 (0.0-1749.8)    |
| Mar                      | Overall | 2  | 2.56  | 78.2 (9.5-282.5)    |
|                          | PWH     | 0  | 0.90  | 0.0 (0.0-409.5)     |
|                          | PWoH    | 2  | 1.66  | 120.7 (14.6-436.2)  |
| Apr                      | Overall | 6  | 6.06  | 99.0 (36.3-215.5)   |
|                          | PWH     | 1  | 2.13  | 47.0 (1.2-261.6)    |
|                          | PWoH    | 5  | 3.93  | 127.2 (41.3-296.8)  |
| May                      | Overall | 8  | 9.07  | 88.2 (38.1-173.8)   |
|                          | PWH     | 3  | 3.13  | 95.8 (19.8-272.9)   |
|                          | PWoH    | 5  | 5.94  | 84.2 (27.3-196.5)   |
| June                     | Overall | 3  | 7.33  | 41.0 (8.4-119.7)    |
|                          | PWH     | 1  | 2.52  | 39.7 (1.0-221.2)    |
|                          | PWoH    | 2  | 4.81  | 41.6 (5.0-150.3)    |
| Jul                      | Overall | 16 | 13.25 | 120.7 (69.0-196.1)  |
|                          | PWH     | 4  | 5.60  | 71.4 (19.5-182.7)   |
|                          | PWoH    | 12 | 7.65  | 156.9 (81.1-274.1)  |
| Aug                      | Overall | 69 | 44.68 | 154.4 (120.2-195.4) |
|                          | PWH     | 25 | 19.2  | 130.2 (84.3-192.2)  |
|                          | PWoH    | 44 | 25.5  | 172.7 (125.5-231.8) |
| Sept                     | Overall | 57 | 42.40 | 134.5 (101.8-174.2) |
|                          | PWH     | 18 | 13.9  | 129.9 (77.0-205.3)  |
|                          | PWoH    | 39 | 28.5  | 136.7 (97.2-186.8)  |
| Oct                      | Overall | 20 | 29.25 | 68.4 (41.8-105.6)   |
|                          | PWH     | 7  | 9.5   | 74.1 (29.8-152.7)   |
|                          | PWoH    | 13 | 19.8  | 65.7 (35.0-112.3)   |

|     |         |    |       |                    |
|-----|---------|----|-------|--------------------|
| Nov | Overall | 24 | 19.15 | 125.3 (80.3-186.5) |
|     | PWH     | 7  | 6.0   | 117.3 (47.2-241.8) |
|     | PWoH    | 17 | 13.2  | 128.9 (75.1-206.4) |
| Dec | Overall | 44 | 36.67 | 120.0 (87.2-161.1) |
|     | PWH     | 13 | 11.4  | 114.4 (60.9-195.7) |
|     | PWoH    | 31 | 25.3  | 122.5 (83.2-173.8) |

**eFigure 3:** Histograms of the Date of Severe SARS-CoV-2 Breakthrough Infection, by HIV Status  
a) Calendar time

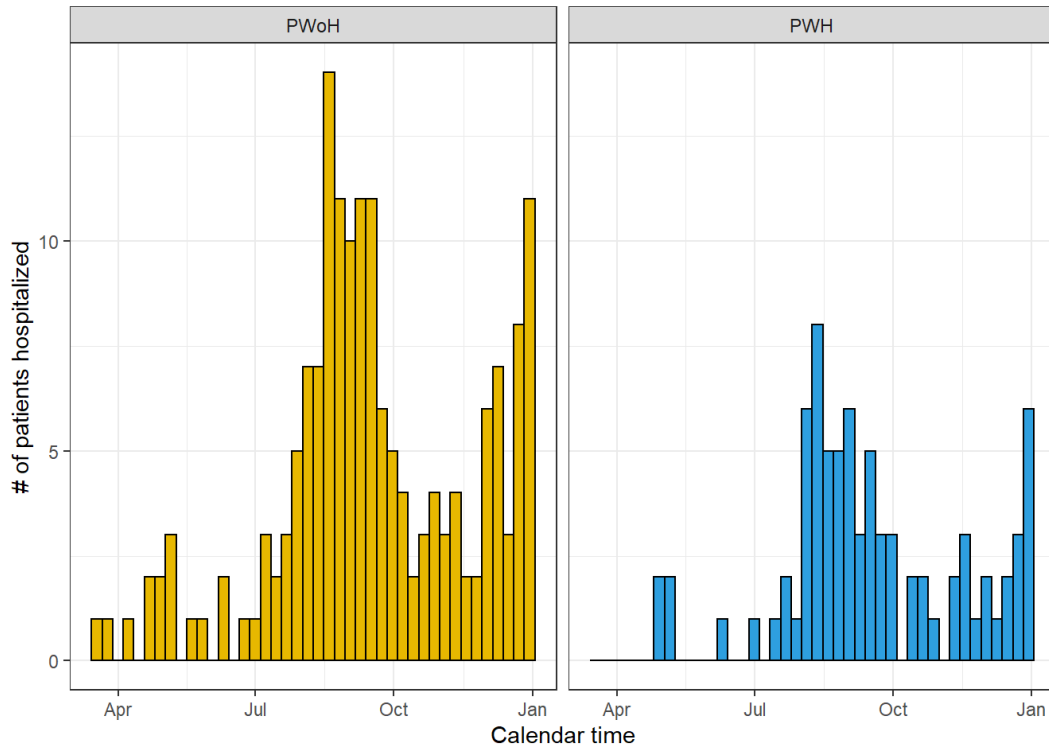

b) Time from date fully vaccinated to breakthrough

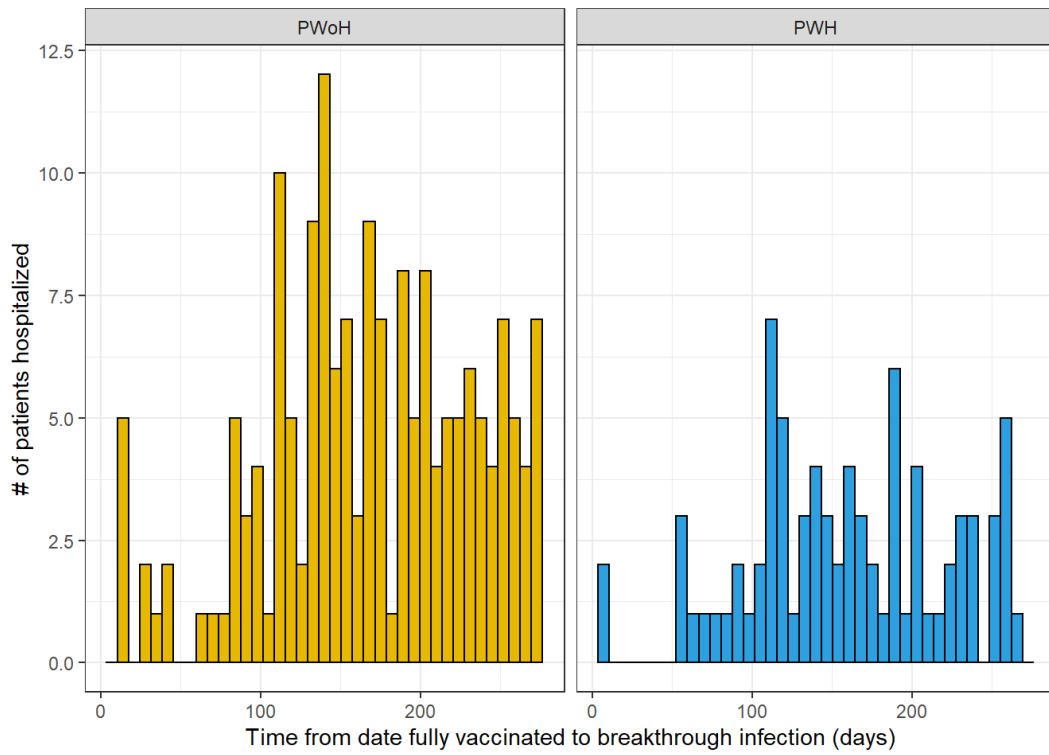

**eFigure 4:** Cumulative Incidence of Severe COVID-19 Breakthrough Illness (and 95% Confidence Intervals Represented by the Shading) Stratified by CD4 Count and HIV Status

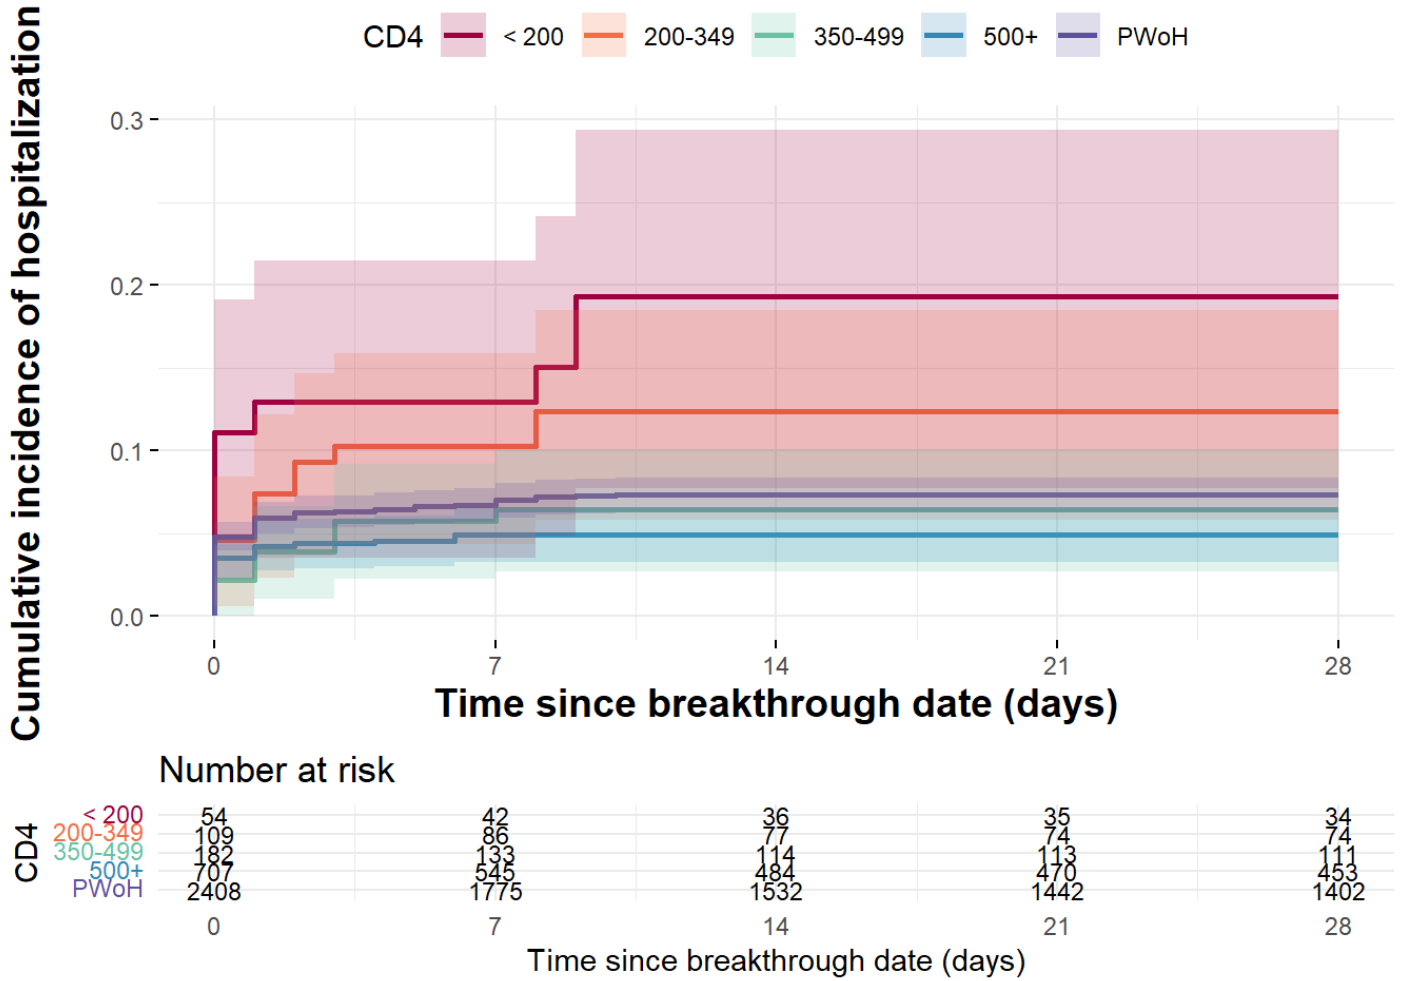

Log-rank test:  $p < 0.001$

**eTable 6:** Characteristics of Participants With Breakthrough COVID-19 Illness Requiring Hospitalization, Mechanical Ventilation or in Those Who Died

| Characteristic                                           | Patients, No. (%)                 |                        |                  |
|----------------------------------------------------------|-----------------------------------|------------------------|------------------|
|                                                          | Hospitalized<br>(Severe COVID-19) | Mechanical ventilation | Death            |
|                                                          | <b>N = 249</b>                    | <b>N = 24</b>          | <b>N = 20</b>    |
| <b>HIV Status</b>                                        |                                   |                        |                  |
| PWoH                                                     | 170 (68.3)                        | 16 (66.7)              | 14 (70.0)        |
| PWH                                                      | 79 (31.7)                         | 8 (33.3)               | 6 (30.0)         |
| <b>Age (years)</b>                                       |                                   |                        |                  |
| <55                                                      | 26 (10.4)                         | 3 (12.5)               | 2 (10.0)         |
| 55-64                                                    | 82 (32.9)                         | 9 (37.5)               | 4 (20.0)         |
| 65-74                                                    | 95 (38.2)                         | 6 (25.0)               | 5 (25.0)         |
| 75+                                                      | 46 (18.5)                         | 6 (25.0)               | 9 (45.0)         |
| <b>Sex</b>                                               |                                   |                        |                  |
| Male                                                     | 235 (94.4)                        | 20 (83.3)              | 18 (90.0)        |
| Female                                                   | 14 (5.6)                          | 4 (16.7)               | 2 (10.0)         |
| <b>Ethnicity and Race</b>                                |                                   |                        |                  |
| Hispanic                                                 | 34 (13.7)                         | 4 (16.7)               | 4 (20.0)         |
| Non-Hispanic Black/African American                      | 131 (52.6)                        | 18 (75.0)              | 11 (55.0)        |
| Non-Hispanic White                                       | 74 (29.7)                         | 2 (8.3)                | 5 (25.0)         |
| Other                                                    | 9 (3.6)                           | 0 (0.0)                | 0 (0.0)          |
| Unknown                                                  | 1 (0.4)                           | 0 (0.0)                | 0 (0.0)          |
| <b>Month of breakthrough</b>                             |                                   |                        |                  |
| Jan-June                                                 | 21 (8.4)                          | 3 (12.5)               | 3 (15.0)         |
| July-Oct                                                 | 162 (65.1)                        | 16 (66.7)              | 13 (65.0)        |
| Nov-Dec                                                  | 66 (26.5)                         | 5 (20.8)               | 4 (20.0)         |
| <b>COVID prior to vaccination</b>                        | 15 (6.0)                          | 0 (0.0)                | 0 (0.0)          |
| <b>Vaccine Series</b>                                    |                                   |                        |                  |
| Primary Series Only                                      | 230 (92.4)                        | 21 (87.5)              | 18 (90.0)        |
| Primary Series + additional dose                         | 19 (7.6)                          | 3 (12.5)               | 2 (10.0)         |
| <b>Obese BMI (<math>\geq 30</math> kg/m<sup>2</sup>)</b> | 118 (50.0)                        | 20 (87.0)              | 13 (65.0)        |
| Unknown                                                  | 13 (5.2)                          | 1 (4.2)                | 1 (5.0)          |
| <b>Diabetes</b>                                          | 131 (52.6)                        | 15 (62.5)              | 13 (65.0)        |
| <b>Hypertension</b>                                      | 212 (85.1)                        | 23 (95.8)              | 19 (95.0)        |
| <b>End-stage kidney disease</b>                          | 26 (10.4)                         | 5 (20.8)               | 6 (30.0)         |
| <b>Organ or tissue transplantation</b>                   | 17 (6.8)                          | 5 (20.8)               | 4 (20.0)         |
| <b>Rheumatoid arthritis</b>                              | 7 (2.8)                           | 3 (12.5)               | 2 (10.0)         |
| <b>Systemic lupus erythematosus</b>                      | 2 (0.8)                           | 0 (0.0)                | 0 (0.0)          |
| <b>Cancer diagnosis</b>                                  | 48 (19.3)                         | 5 (20.8)               | 5 (25.0)         |
| <b>CD4 at ART initiation, median (IQR)</b>               | 399 (212,546)                     | 376<br>(324,417)       | 398<br>(354,855) |
| Unknown                                                  | 210 (84.3)                        | 20 (83.3)              | 1 (16.7)         |
| <b>AIDS before fully vaccinated</b>                      | 29 (36.7)                         | 3 (37.5)               | 3 (50.0)         |
| Unknown                                                  | 170 (68.3)                        | 16 (66.7)              | 0 (0.0)          |

|                                              |               |               |               |
|----------------------------------------------|---------------|---------------|---------------|
| <b>CD4 at fully vaccinated, median (IQR)</b> | 498 (305,746) | 352 (172,542) | 352 (291,423) |
| Unknown                                      | 181 (72.7)    | 18 (75.0)     | 0 (0.0)       |
| <b>Supressed HIV RNA at fully vaccinated</b> | 59 (86.8)     | 5 (83.3)      | 4 (100.0)     |
| Unknown                                      | 181 (72.7)    | 18 (75.0)     | 0 (0.0)       |

**eFigure 5:** Outcomes of Breakthrough Illness Among Those Hospitalized After Fully Vaccinated to Dec 31, 2021, by HIV Status (n=170 PWoH) and CD4 Count (n=23 <350 Cells/mm<sup>3</sup> and n=45 ≥350 Cells/mm<sup>3</sup>) Among PWH

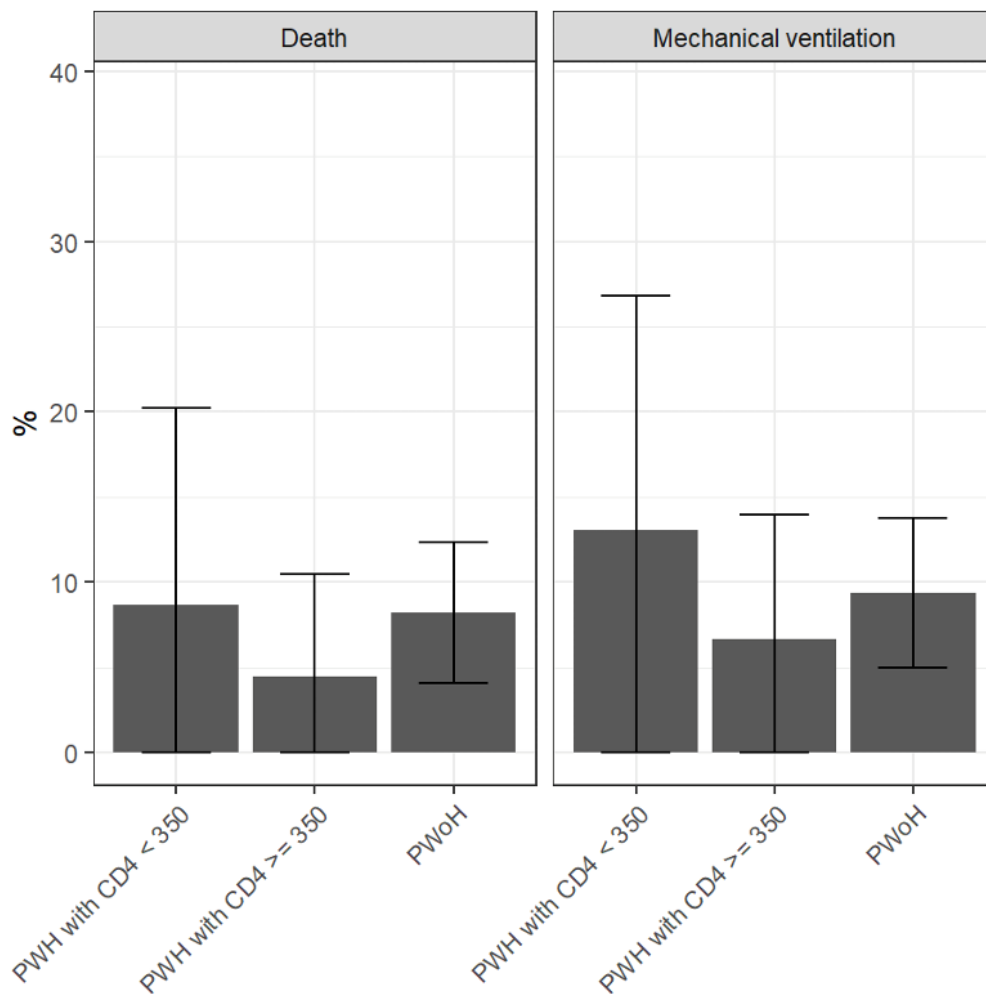

Supplement: jamanetwopen-e2236397-s001.pdf [file jamanetwopen-e2236397-s001.pdf]
